# Supplementary material for: Limitations of principal components in quantitative genetic association models for human studies
Source: eLife journal article supplement (doi:10.7554/elife.79238), 2023-05-04
Supplement: supp [file elife-79238-supp-v1.zip]

Num. Sig. PCs

20  
10  
0

Admix. Large sim.

Admix. Small sim.

Admix. Family sim.

Human Origins

HGDP

1000 Genomes

Human Origins sim.

HGDP sim.

1000 Genomes sim.

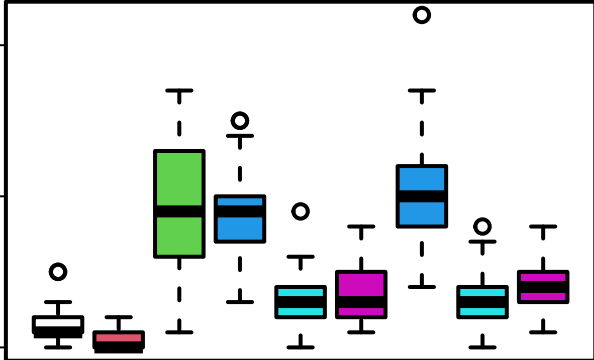

Dataset
