# Supplementary material for: Limitations of principal components in quantitative genetic association models for human studies
Source: eLife journal article supplement (doi:10.7554/elife.79238), 2023-05-04

Calibrated power

0.6

0.4

0.2

0.0

0.0

0.2

0.4

0.6

$AUC_{PR}$

Dataset

Admix. Large sim.

Admix. Small sim.

Admix. Family sim.

Human Origins

Human Origins sim.

HGDP

HGDP sim.

1000 Genomes

1000 Genomes sim.

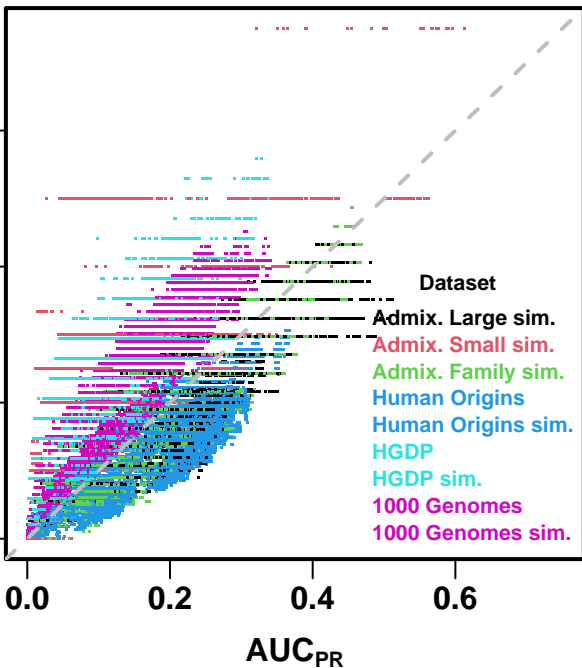

Supplement: supp [file elife-79238-supp-v1.zip]
