# Supplementary figures and images for: Limitations of principal components in quantitative genetic association models for human studies
Source: eLife journal article supplement (doi:10.7554/elife.79238), 2023-05-04

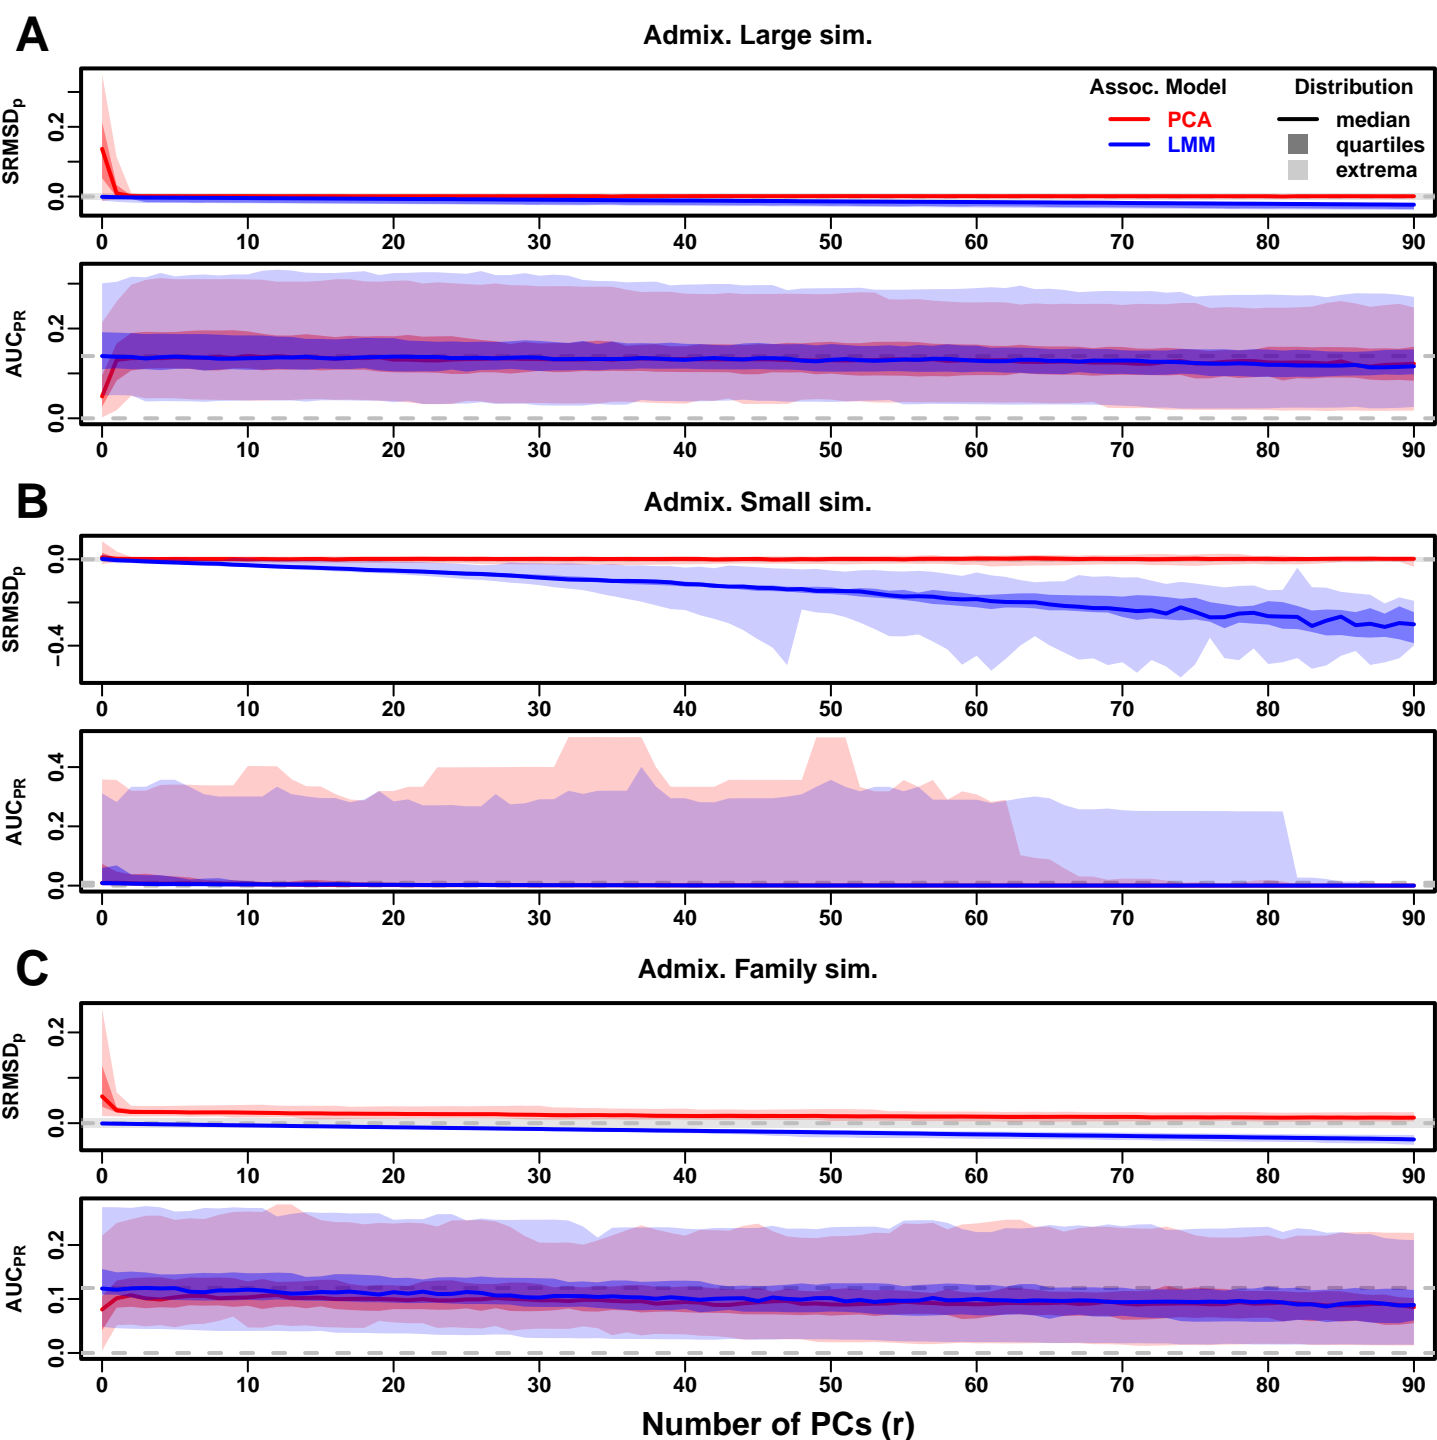

Supplement: supp [file elife-79238-supp-v1.zip]

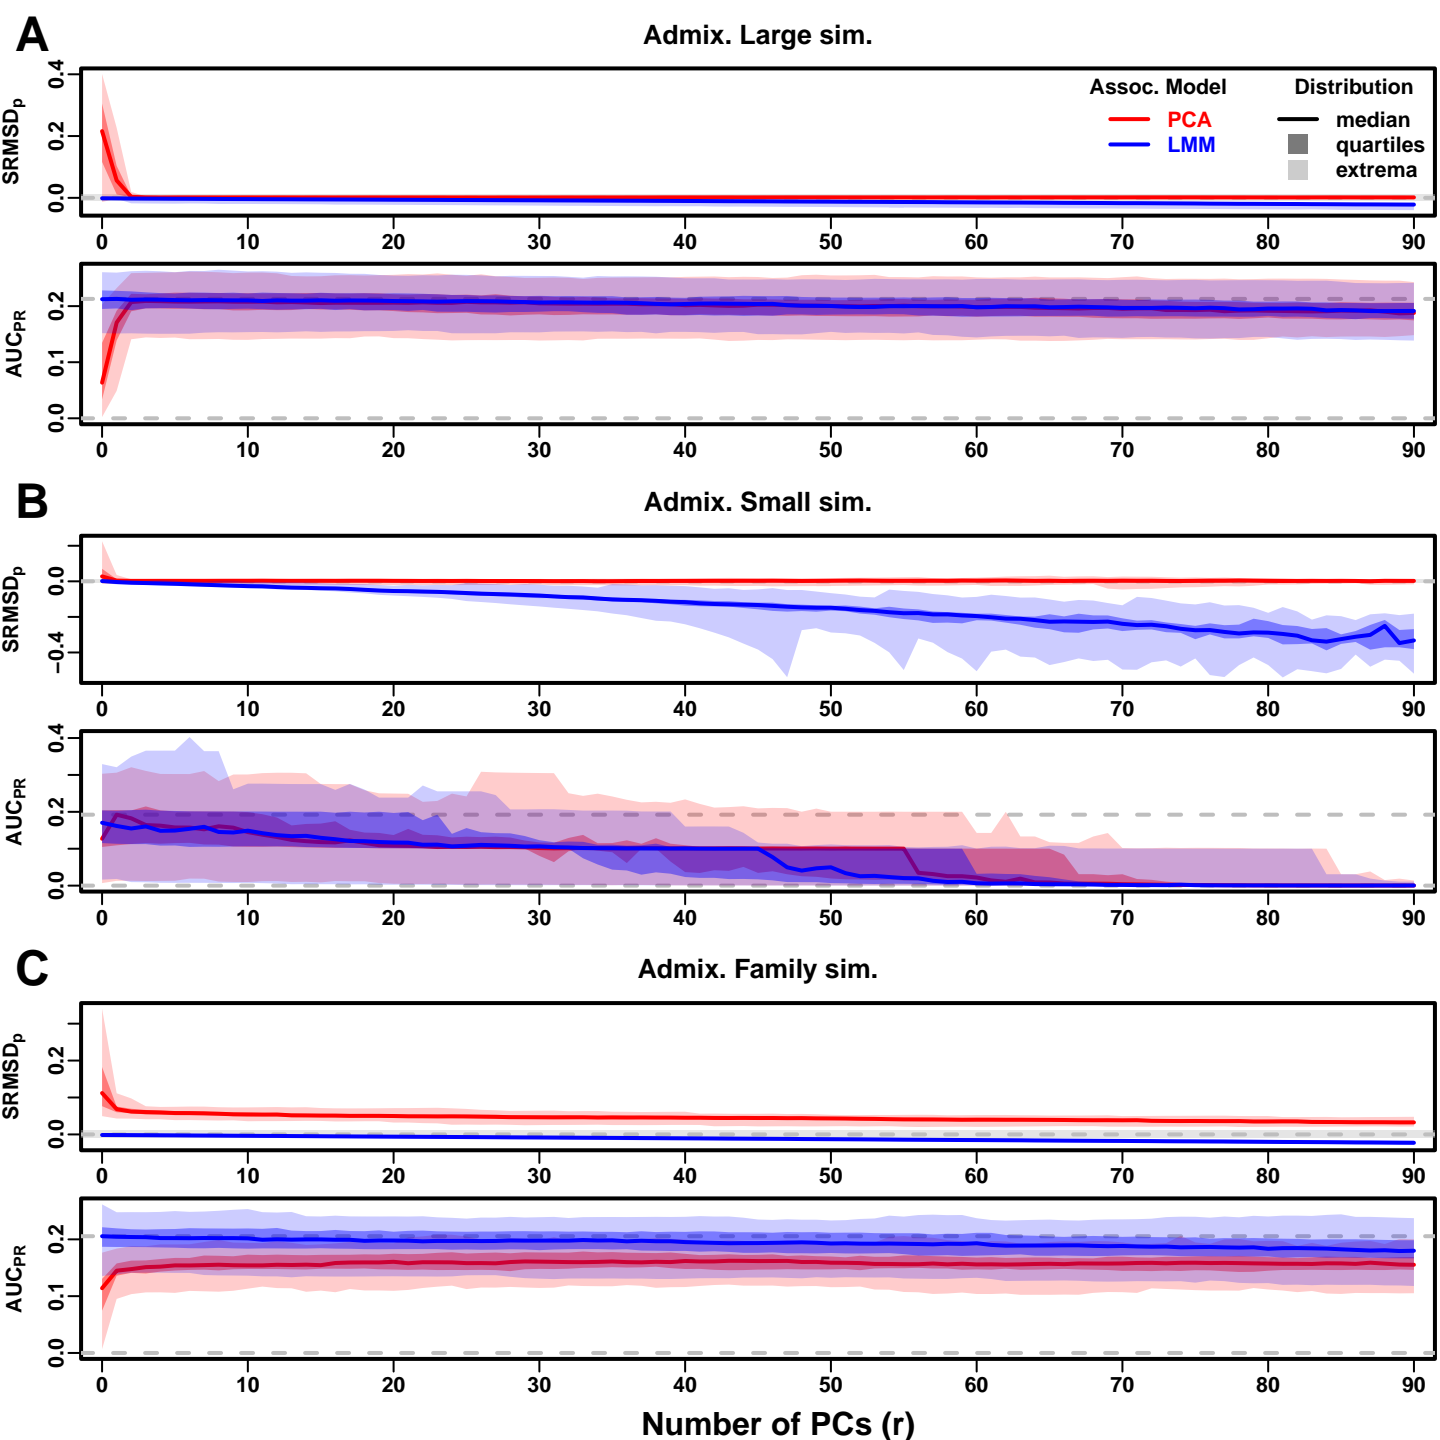

Supplement: supp [file elife-79238-supp-v1.zip]

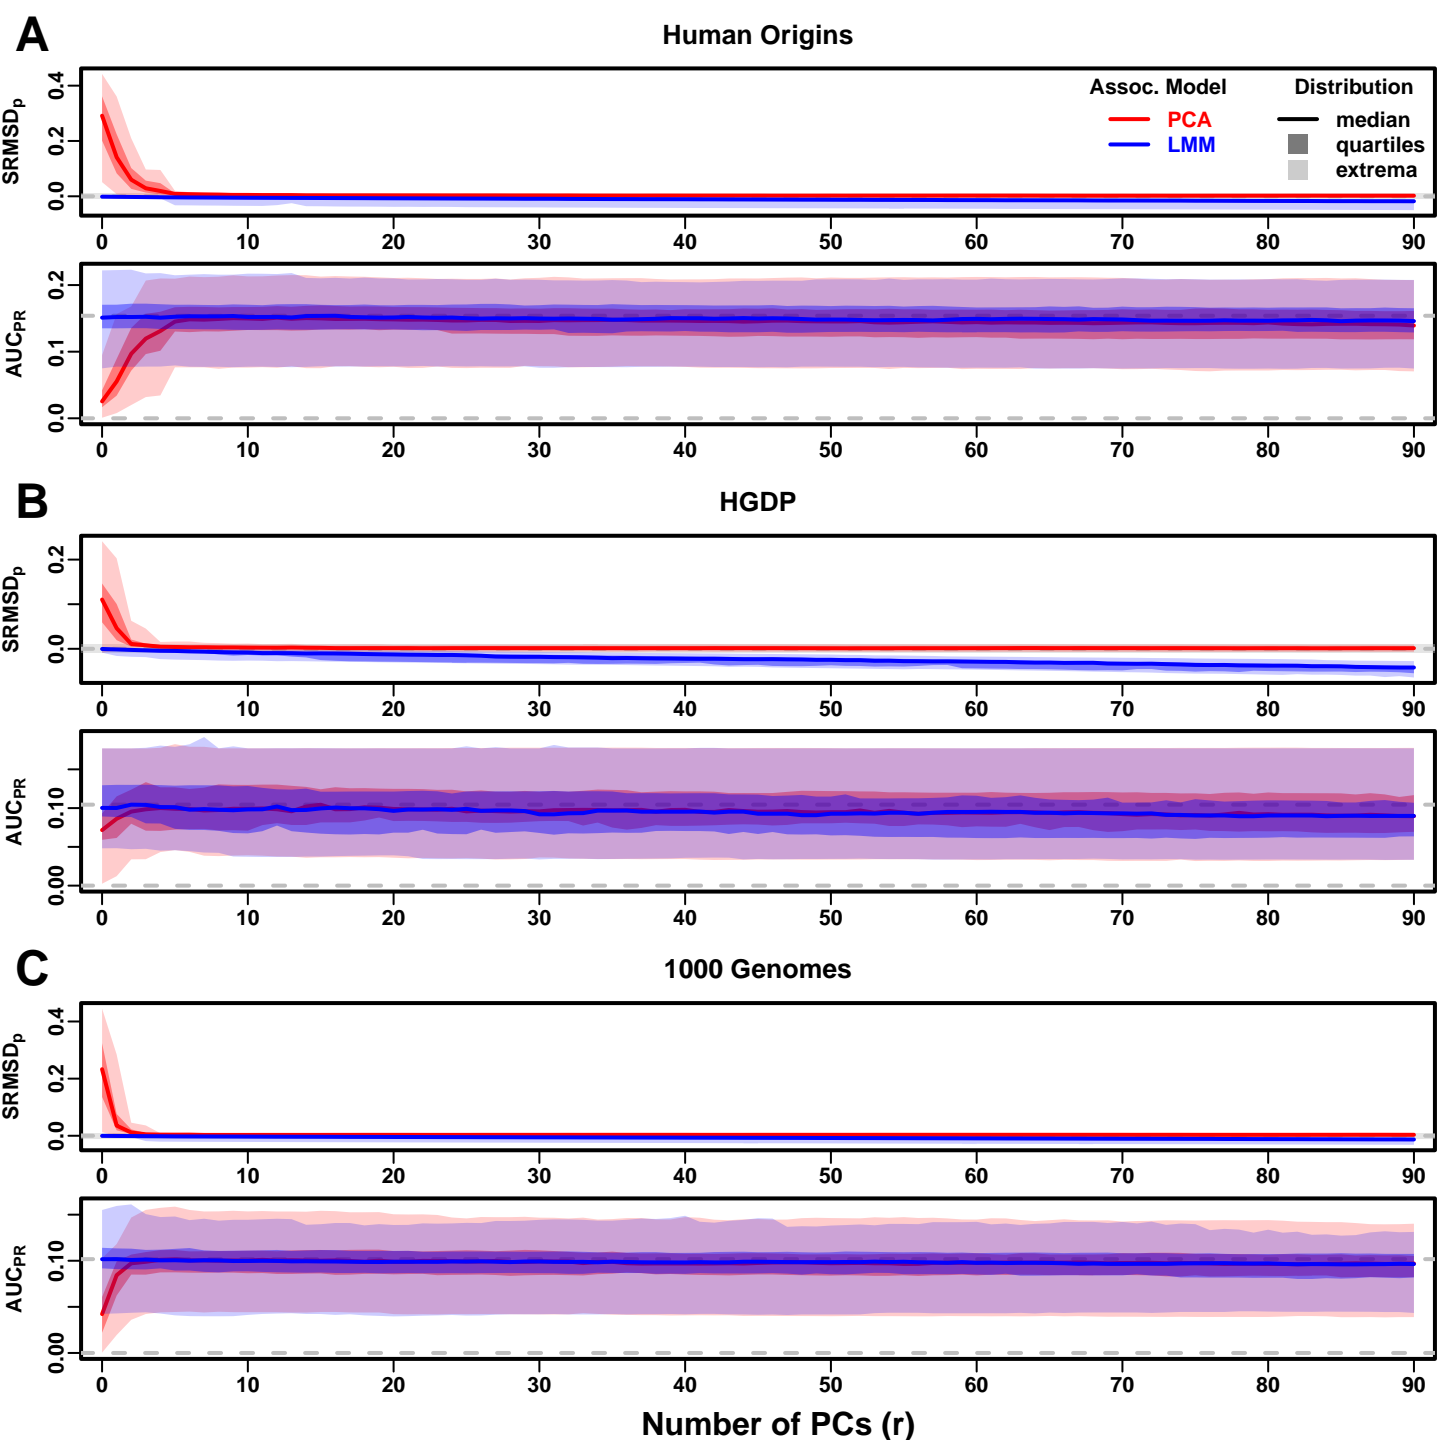

Supplement: supp [file elife-79238-supp-v1.zip]

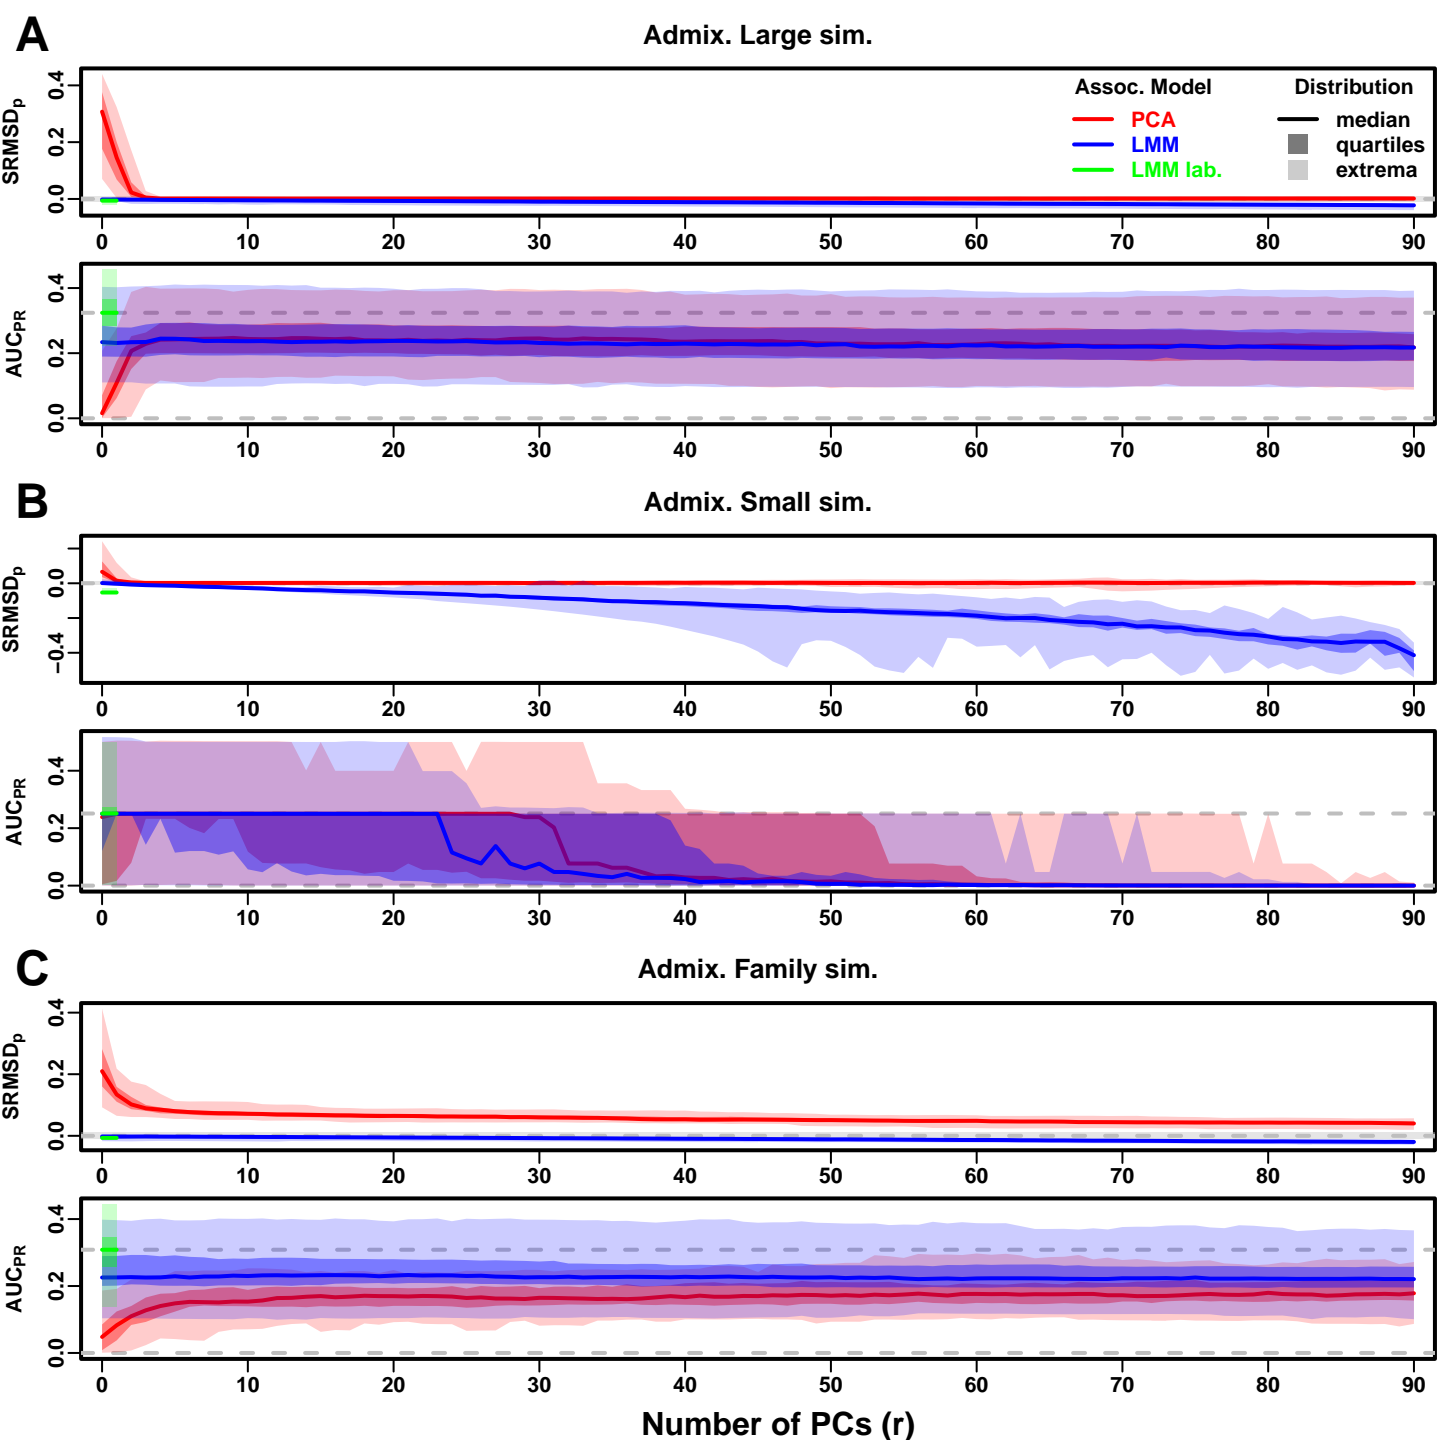

Supplement: supp [file elife-79238-supp-v1.zip]

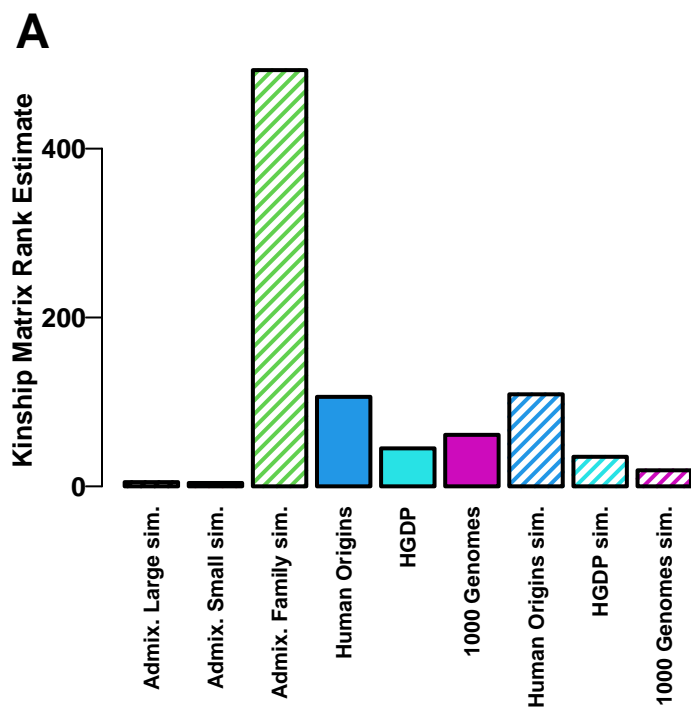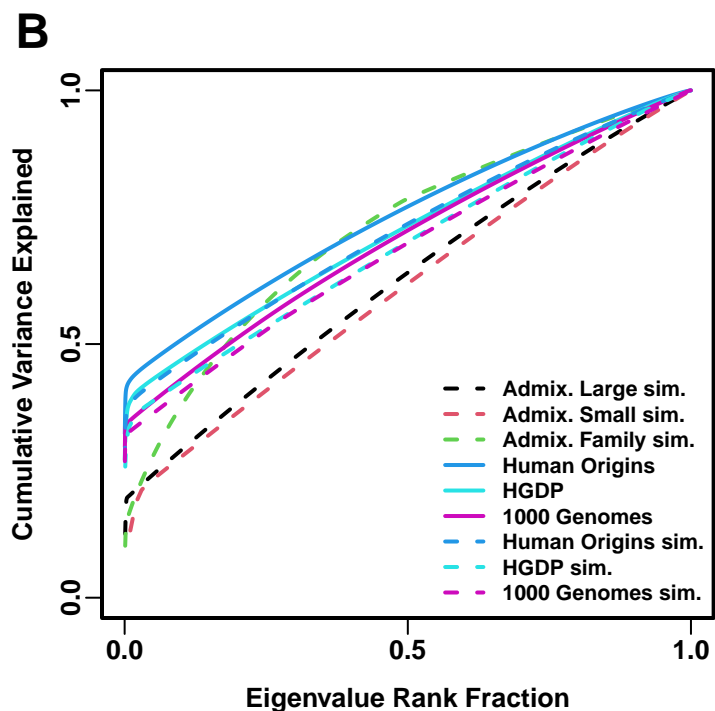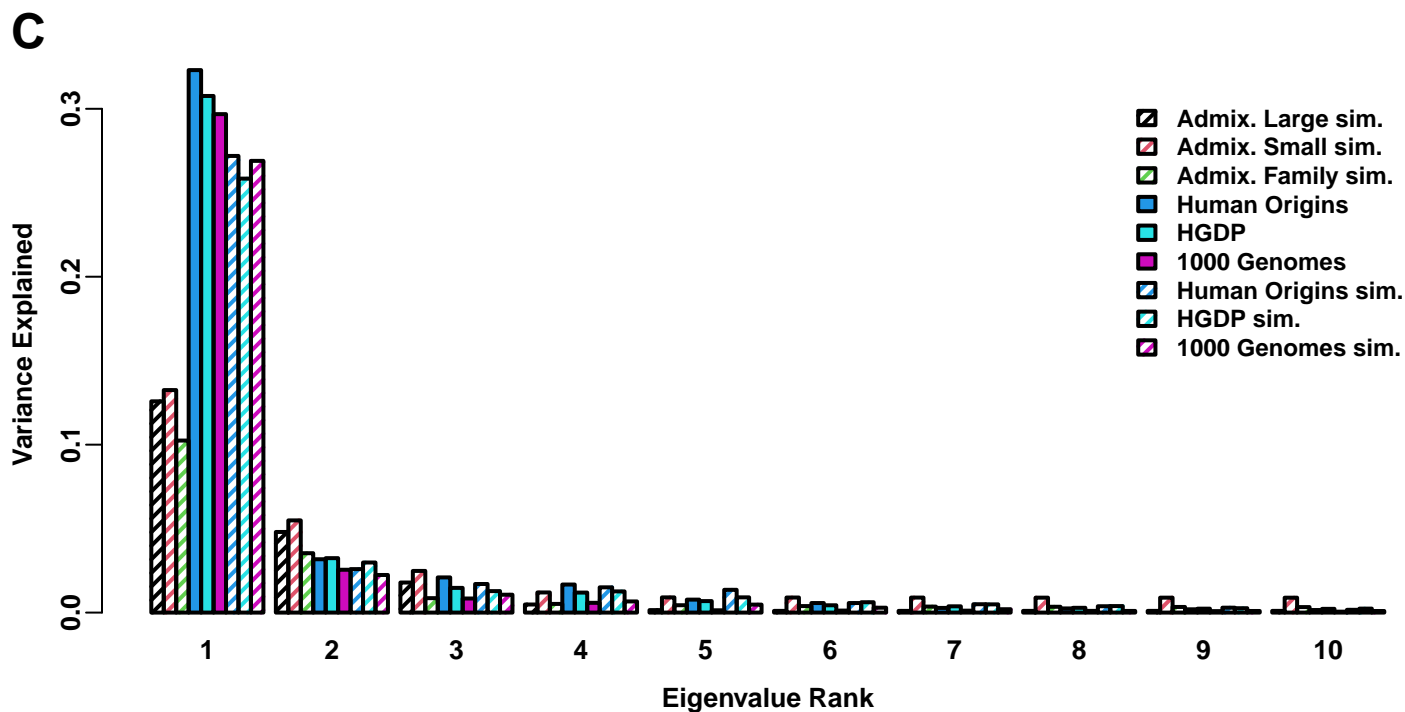

Supplement: supp [file elife-79238-supp-v1.zip]

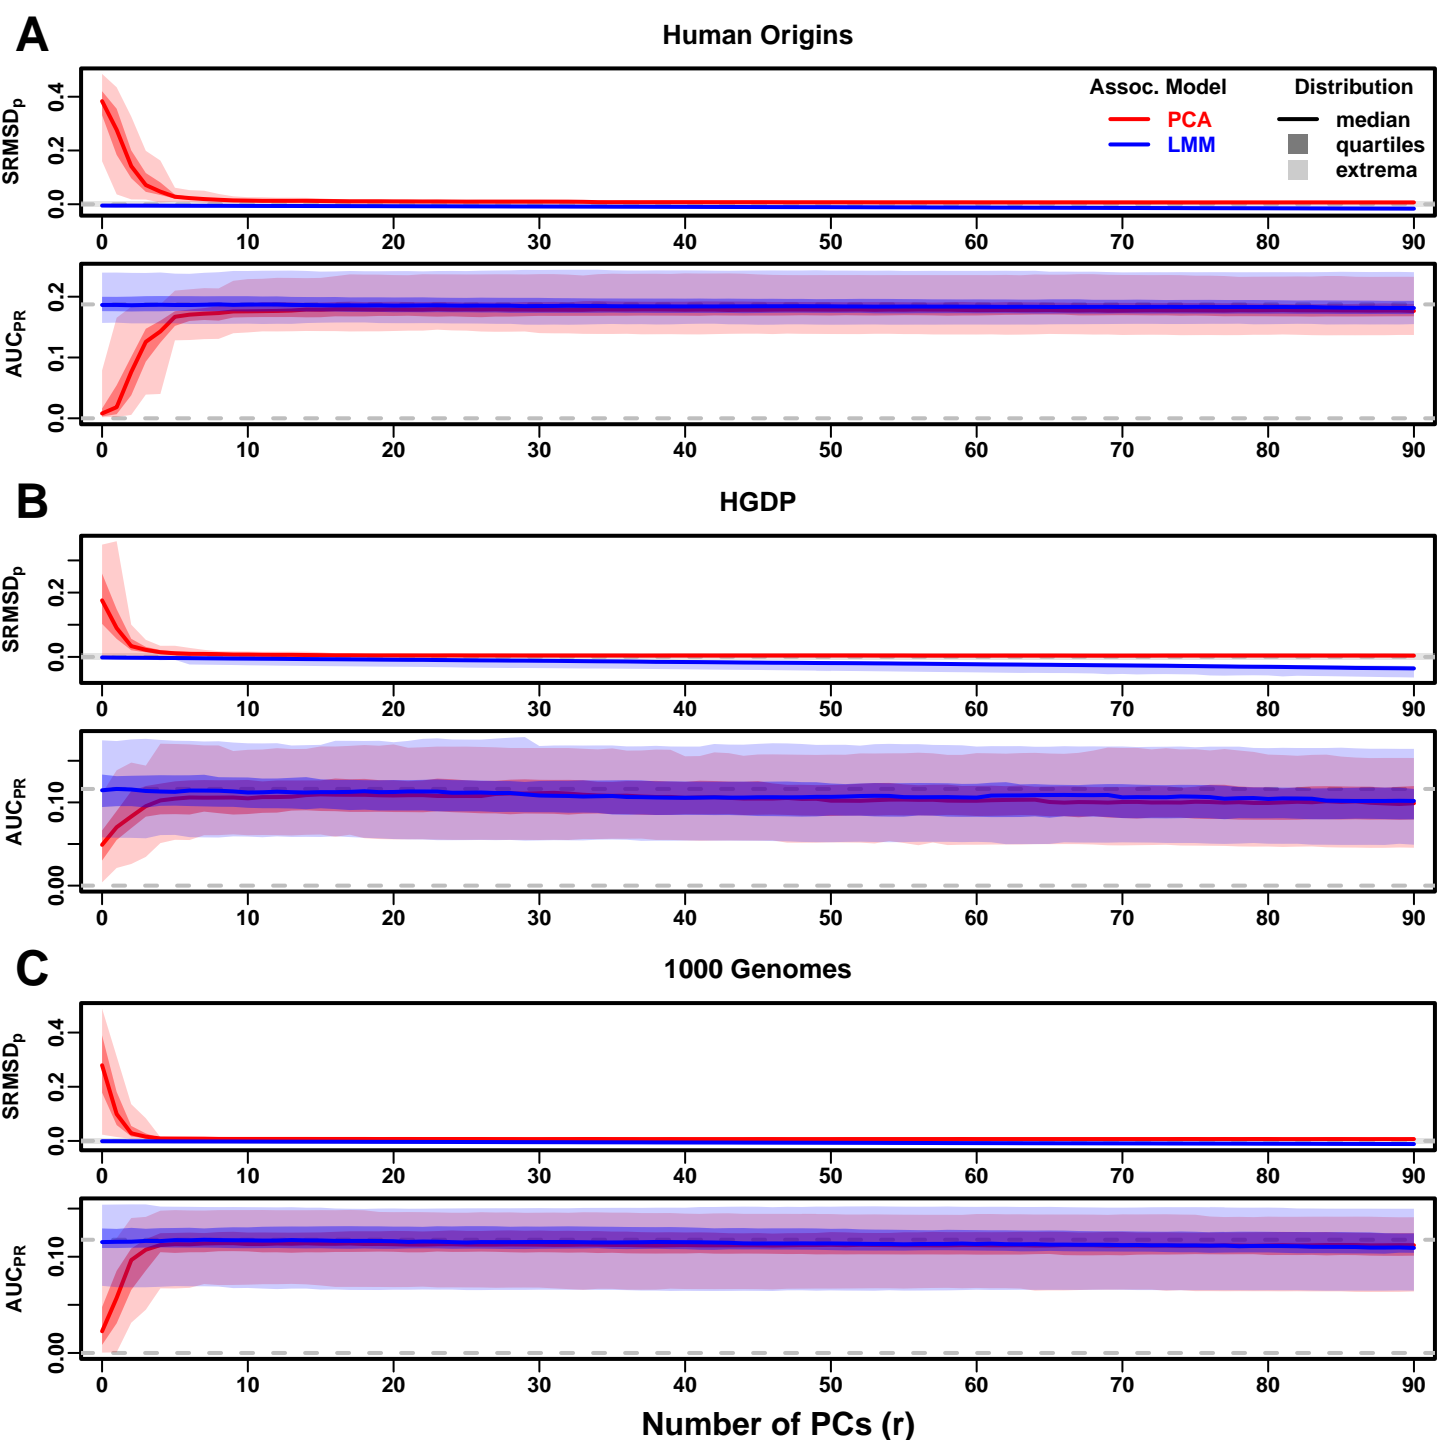

Supplement: supp [file elife-79238-supp-v1.zip]

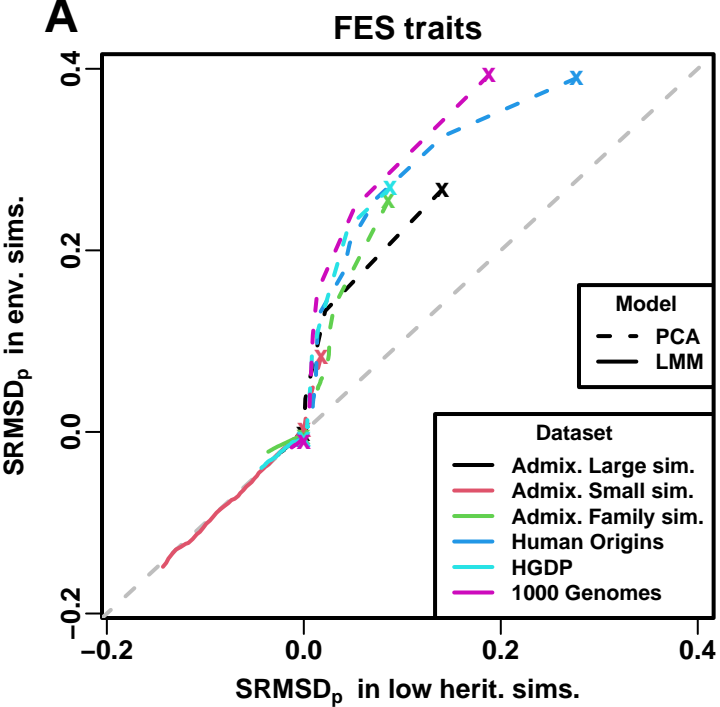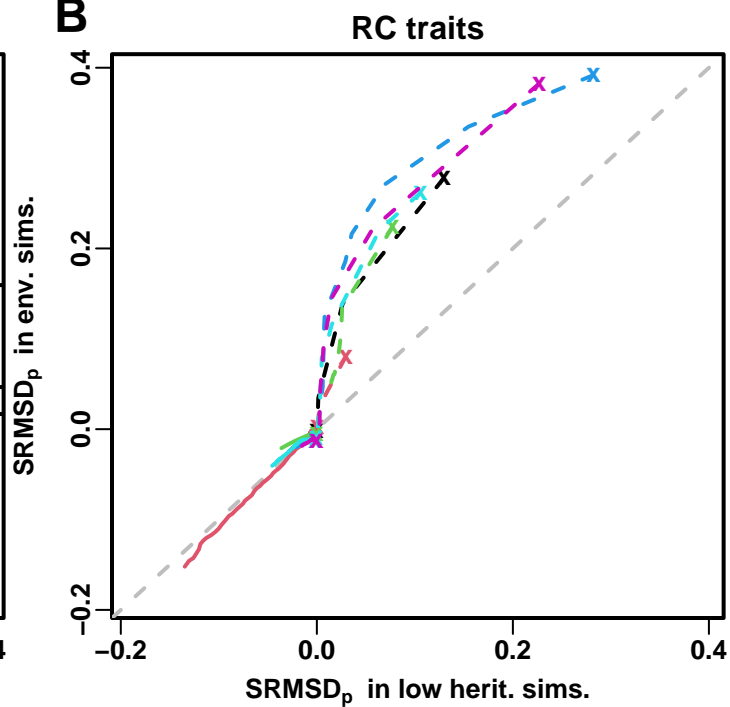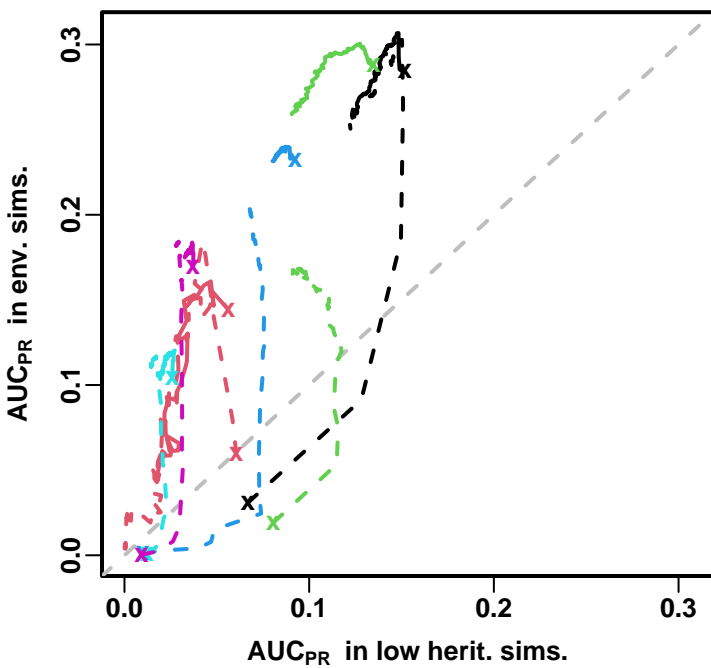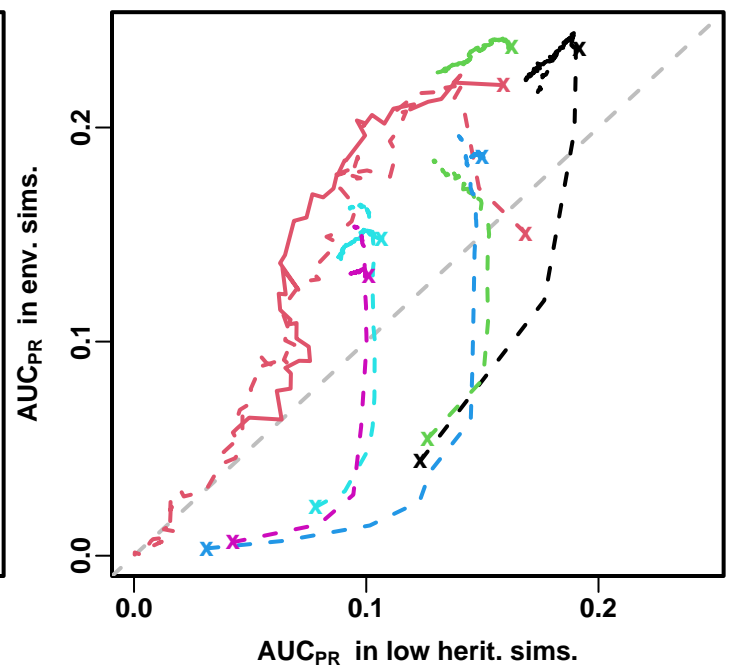

Supplement: supp [file elife-79238-supp-v1.zip]

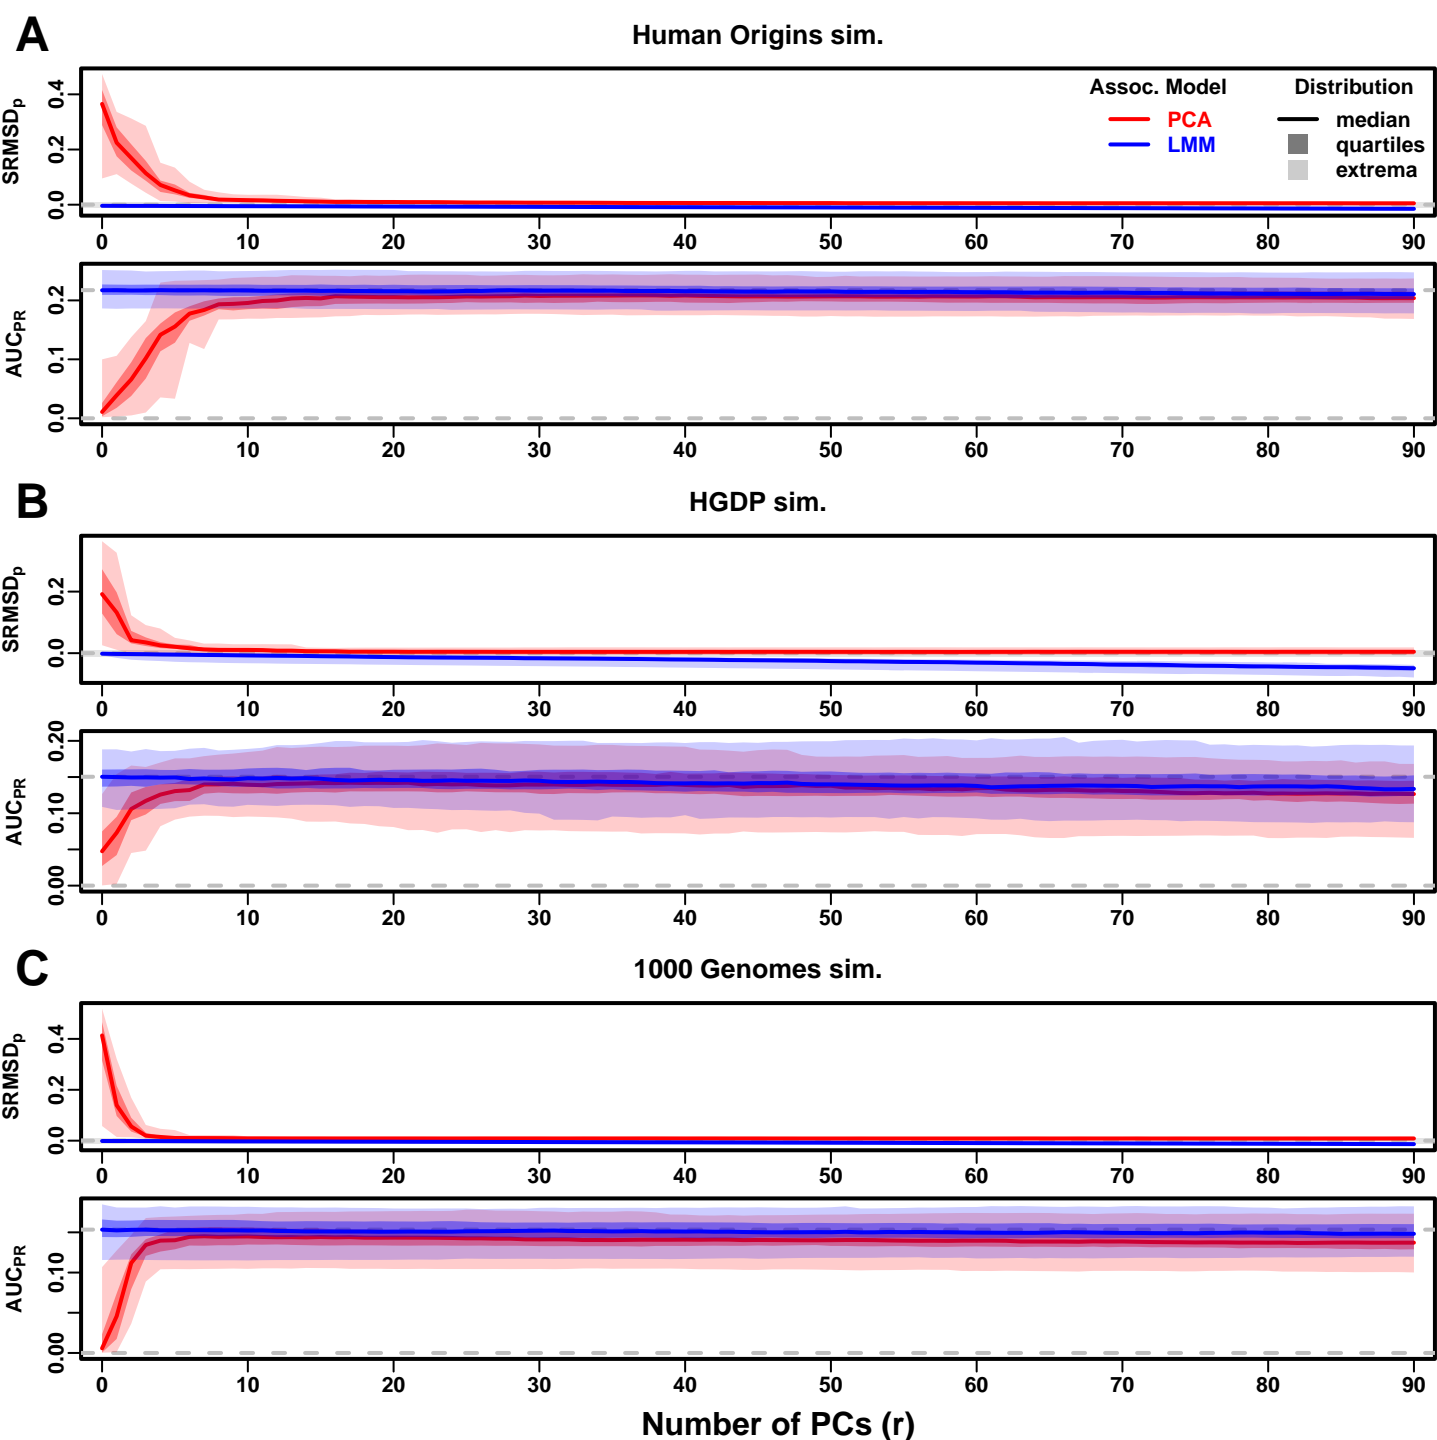

Supplement: supp [file elife-79238-supp-v1.zip]

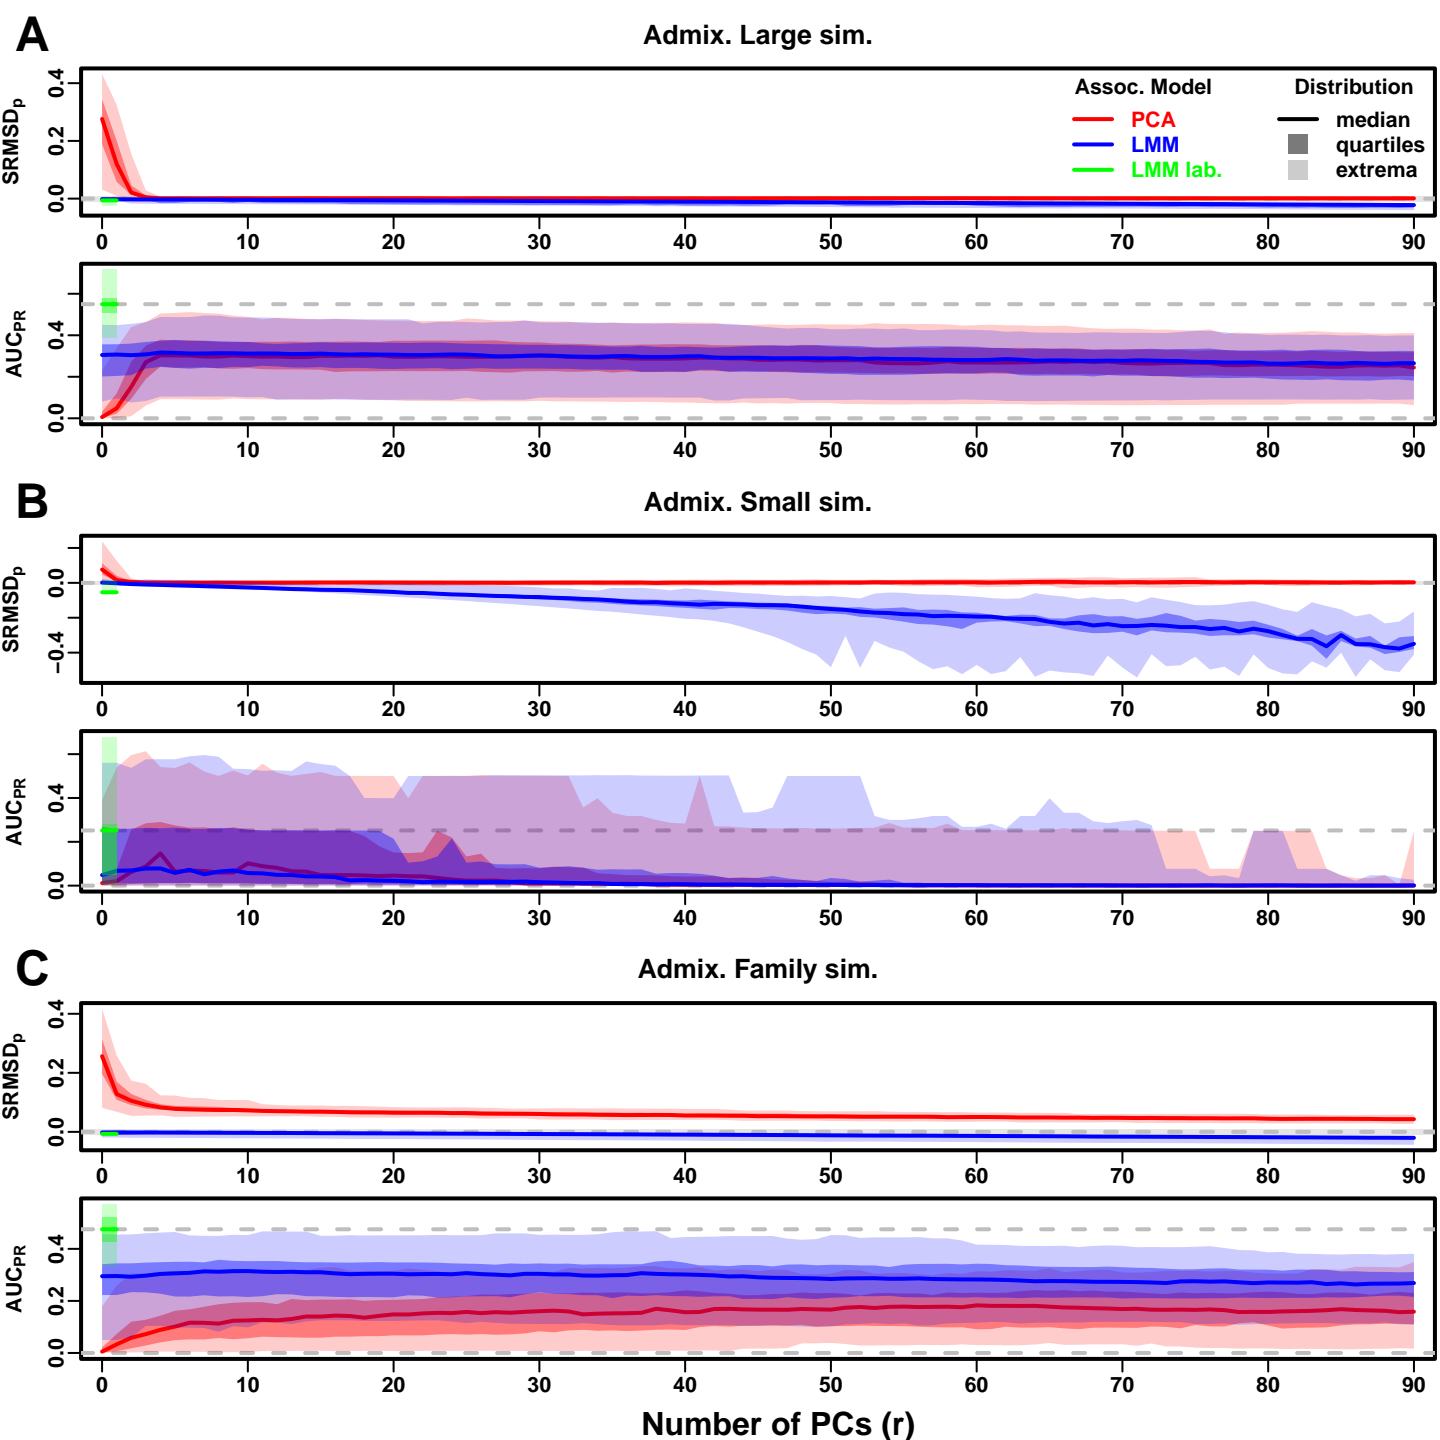

Supplement: supp [file elife-79238-supp-v1.zip]

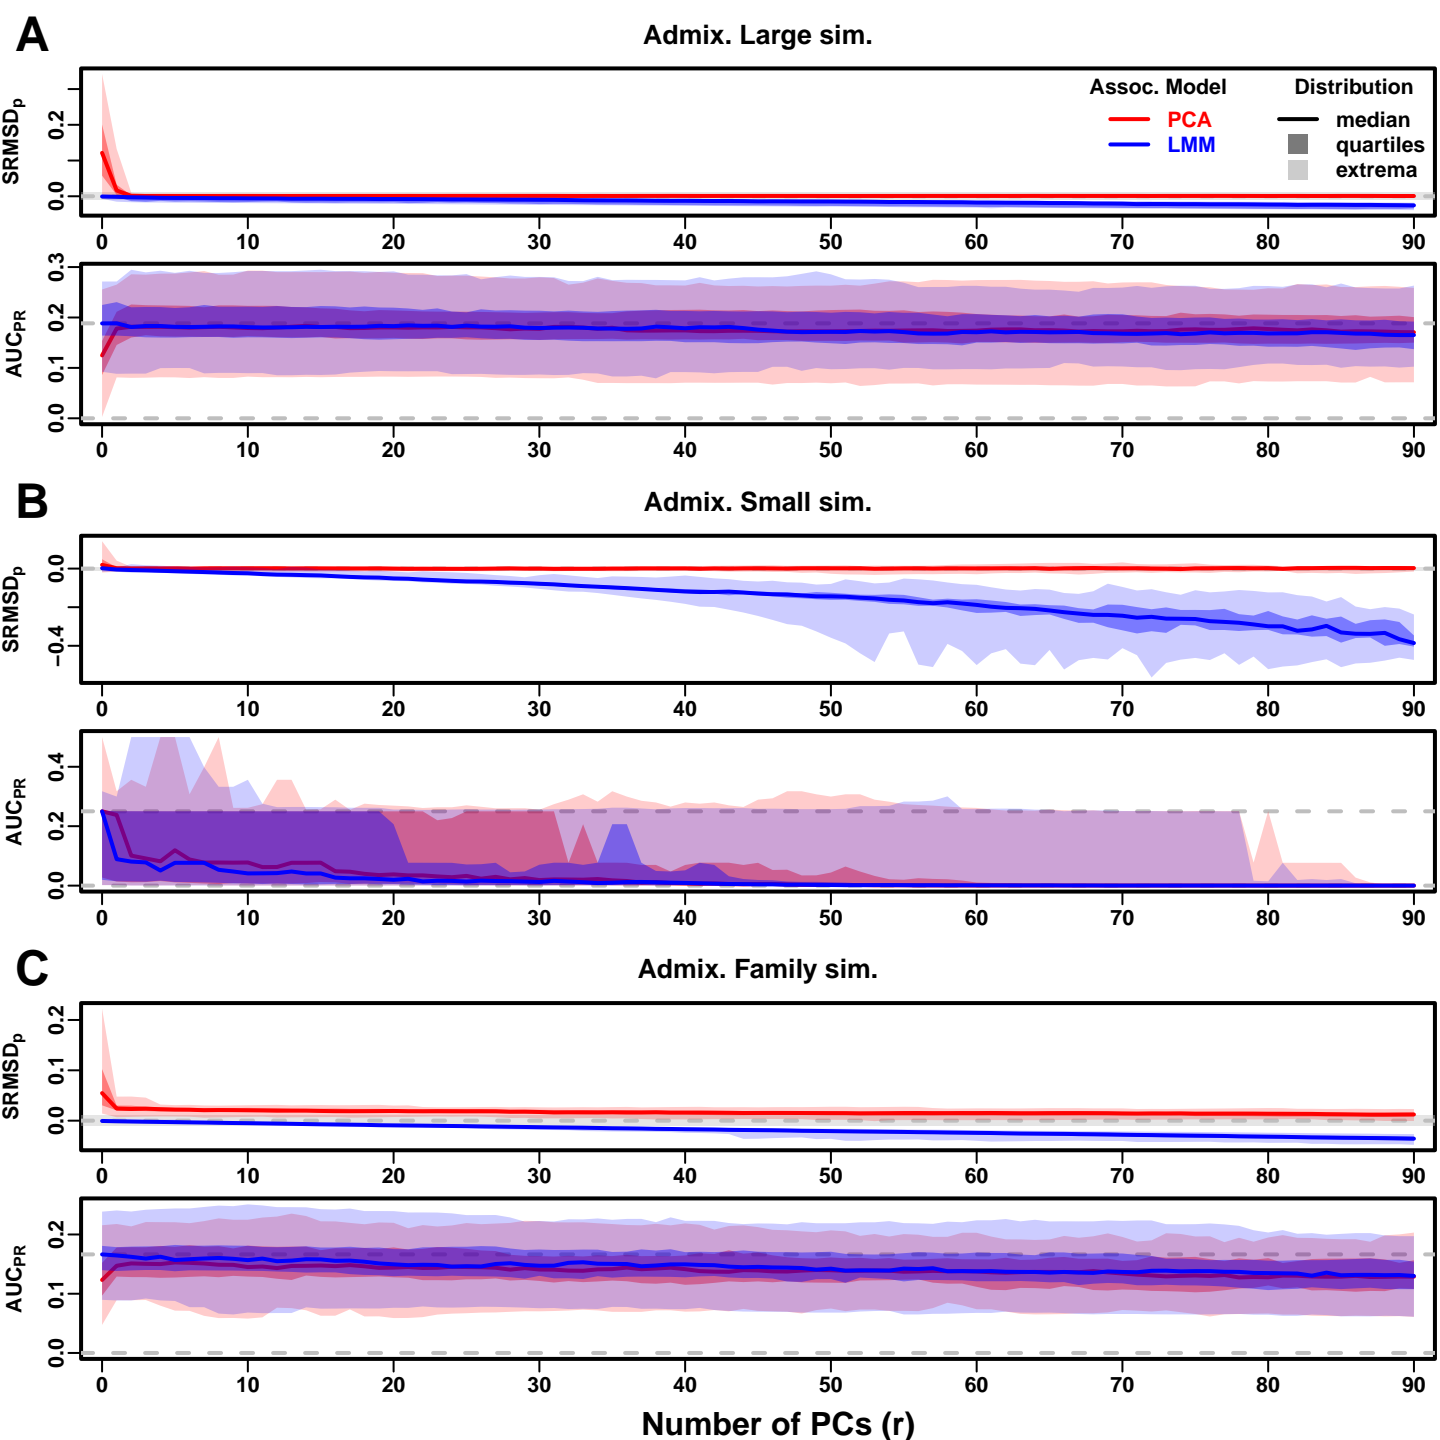

Supplement: supp [file elife-79238-supp-v1.zip]

Inflation Factor

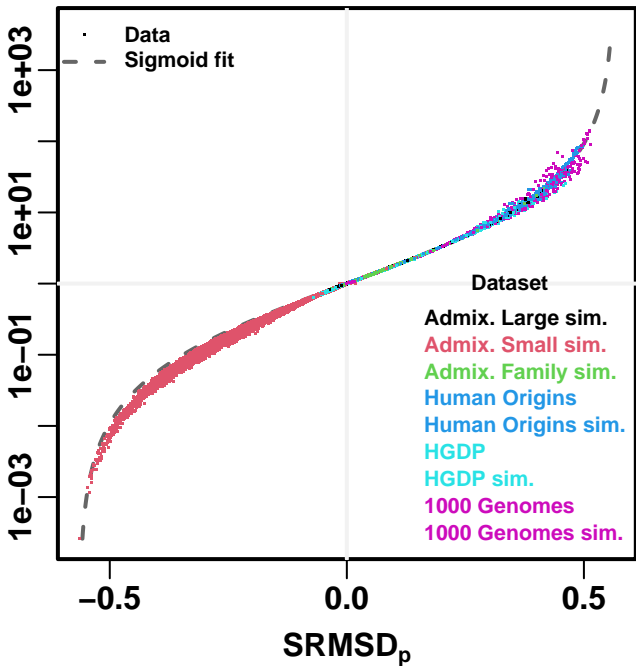

Supplement: supp [file elife-79238-supp-v1.zip]

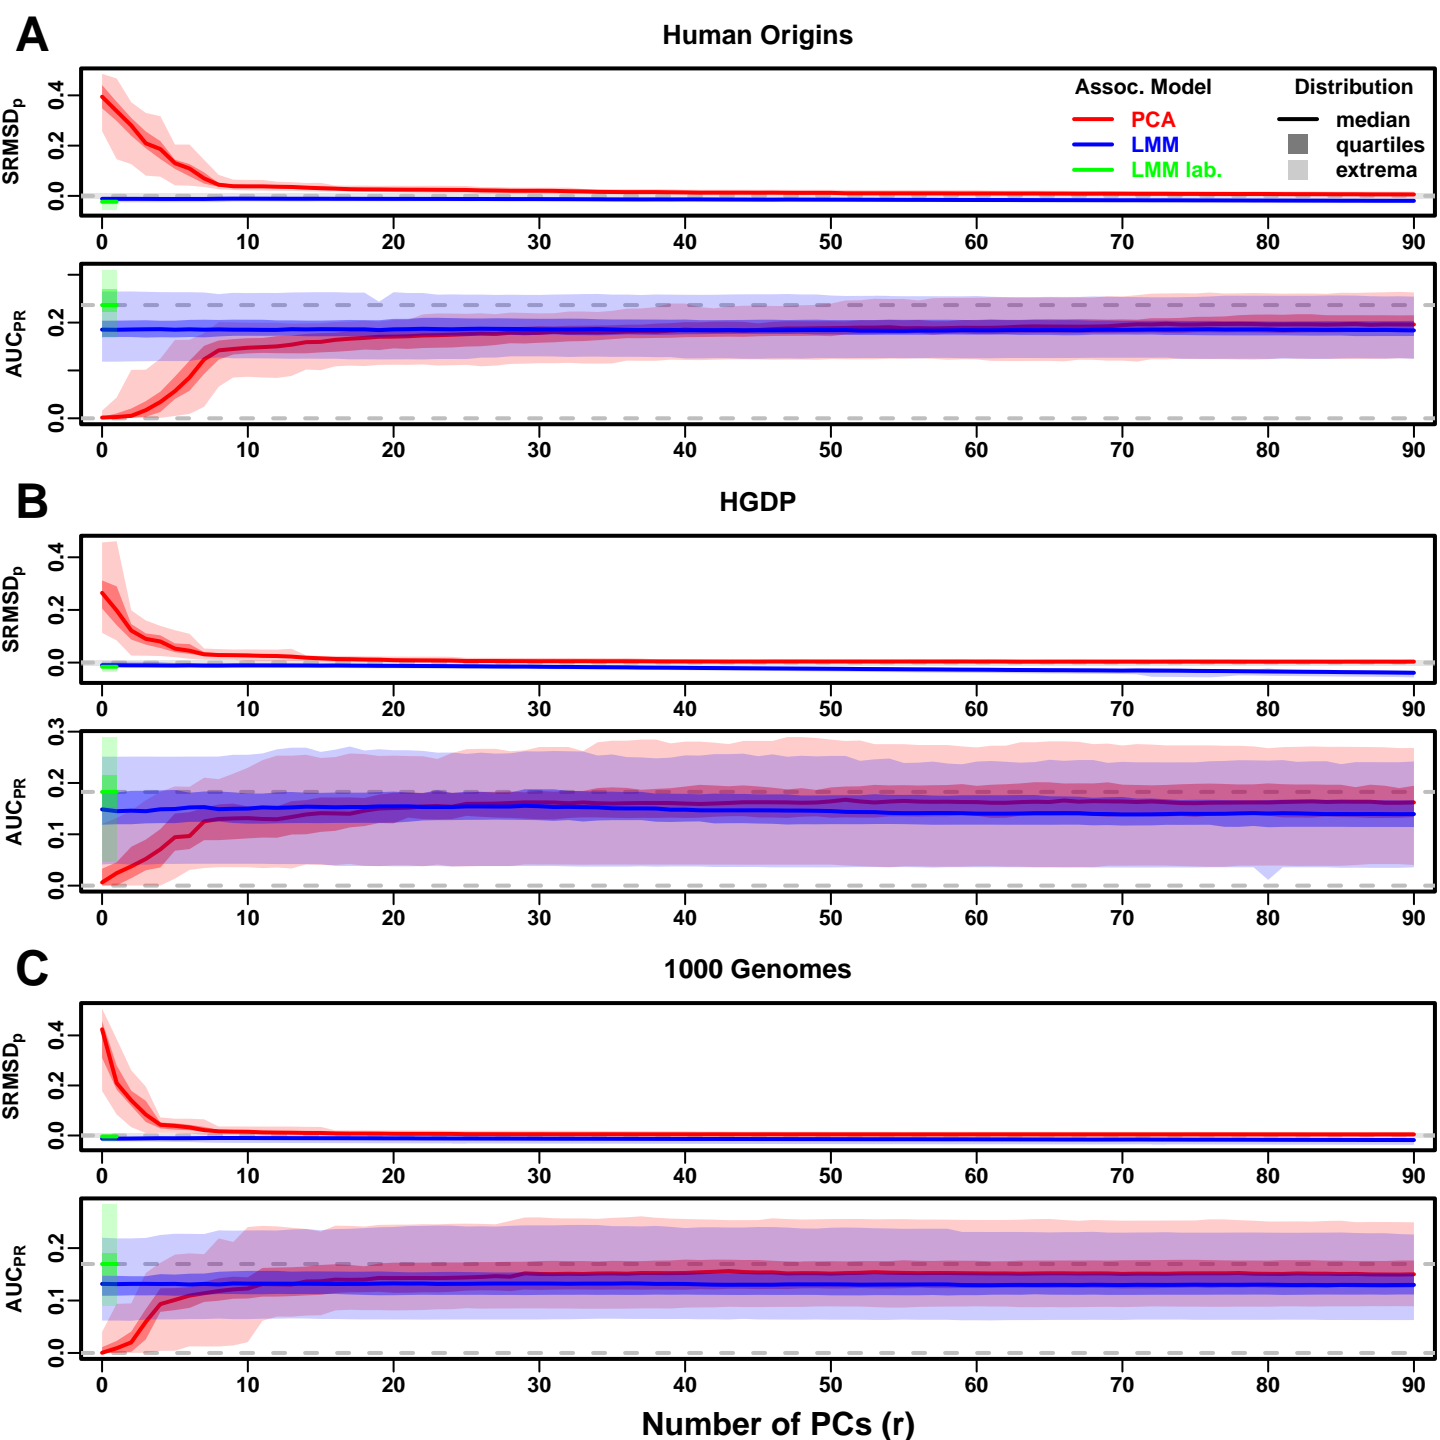

Supplement: supp [file elife-79238-supp-v1.zip]

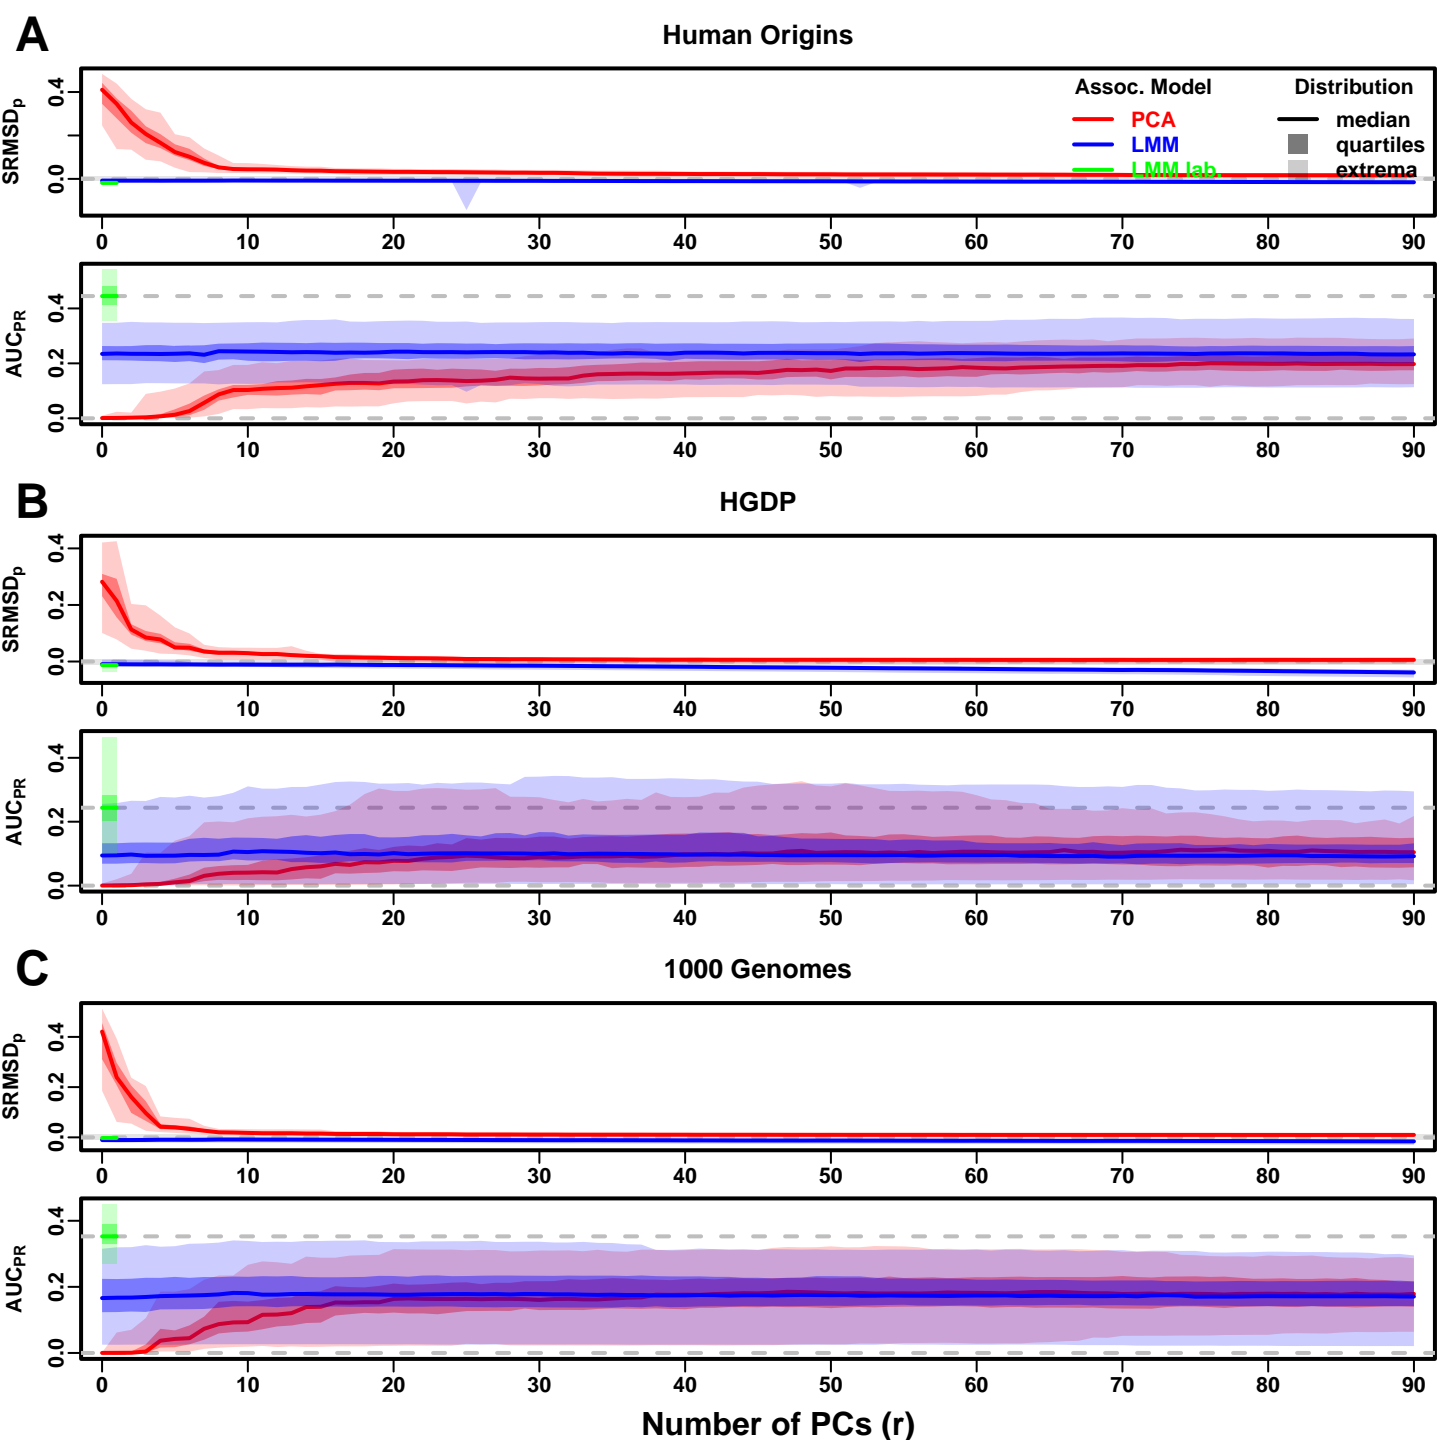

Supplement: supp [file elife-79238-supp-v1.zip]

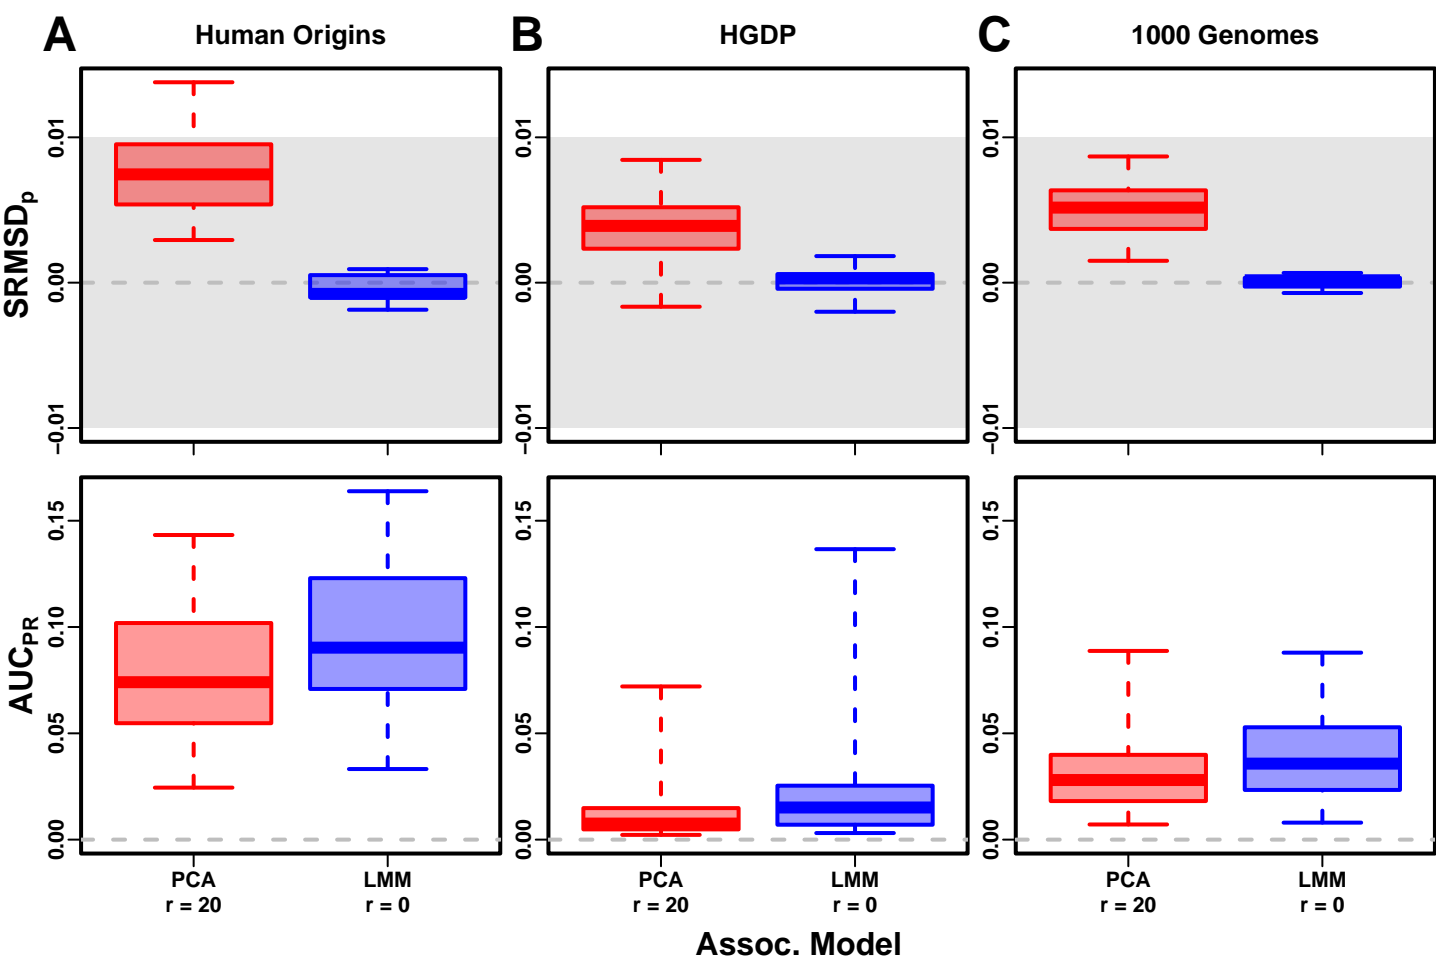

Supplement: supp [file elife-79238-supp-v1.zip]

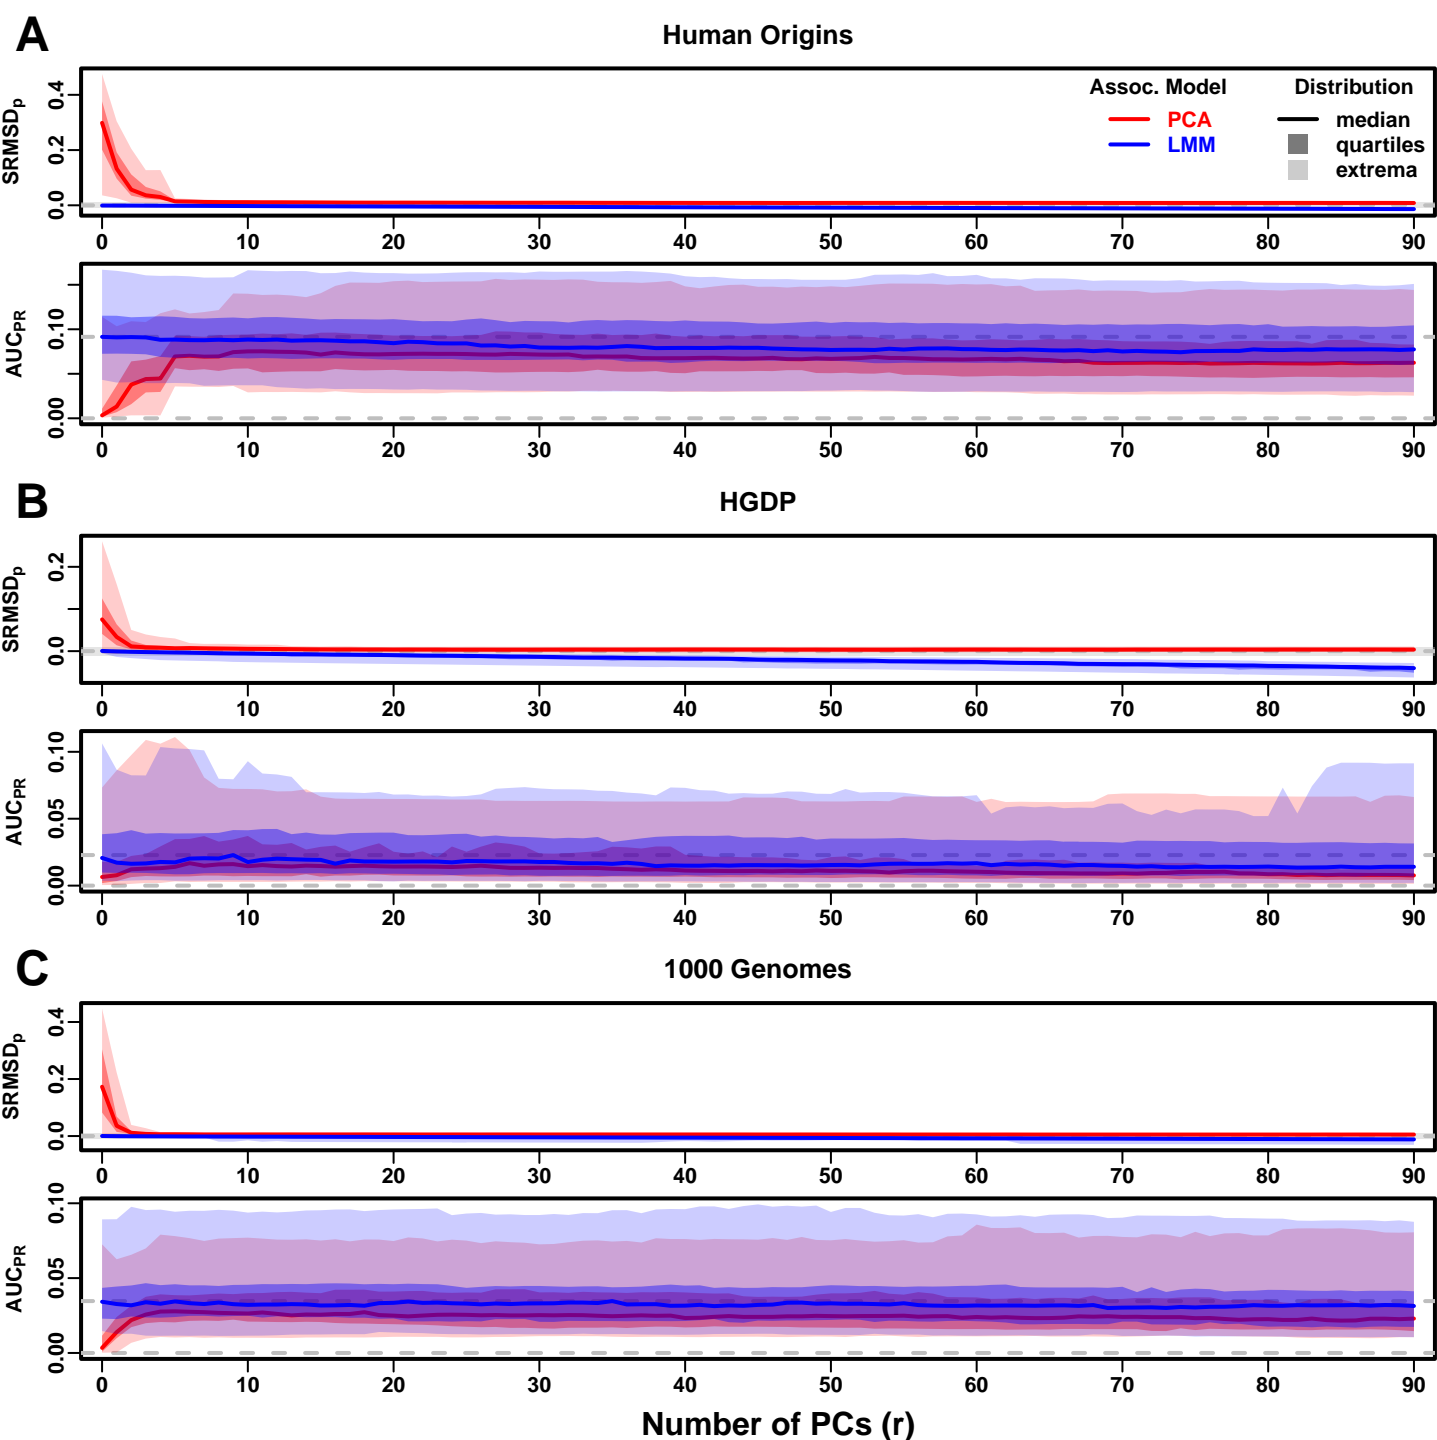

Supplement: supp [file elife-79238-supp-v1.zip]

Type I error rate

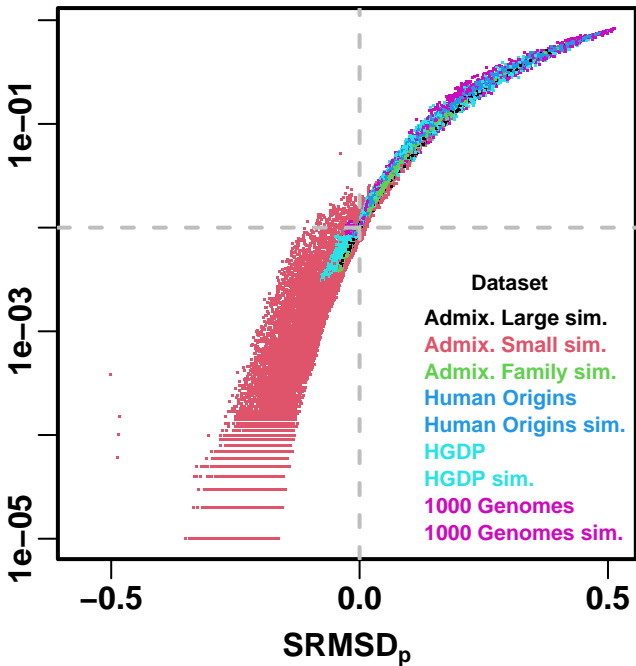

Supplement: supp [file elife-79238-supp-v1.zip]
